## ■ REVIEWS OF WEB SITES

*James C. Eisenach, M.D., Editor*

### **AnesthesiaWeb**

**URL:** <http://www.anesthesiaweb.com/>

**Institutions:** Duke University, Department of Anesthesiology and Roche Laboratories

**Authors/WebMasters:** David Lubarsky, M.D., Chair, Mediaworks, Inc., New York, New York

AnesthesiaWeb is an independent educational resource by and for anesthesia providers since November 1996. Designed in a monthly magazine format, AnesthesiaWeb seeks to present peer-reviewed information of interest that impact on current anesthesia practice. Content areas are diverse and include but are not limited to ambulatory care, bioengineering, critical care, managed care, medical informatics, pediatrics, and pharmacology. A medical NewsFeed area is updated daily from major news sources and provides news pertaining to anesthesia-related topics. There is no charge for access to the site, but use is restricted to medical professionals, and registration is required. Roche Laboratories professional product information is available.

### **Quality of Information**

The information contained in the site is timely and accurate. All editorial content is determined by the Anesthesia Department of Duke University Medical Center and an independent board of practicing and teaching anesthesiologists. The monthly literature review provides excellent insight in the form of opinions, commentary, and abstracts on timely subjects from recent research articles in peer-reviewed journals. The commentaries are thought-provoking, even controversial, and are well referenced. The graphics are exceptional, and the page layout is attractive and functional. The pages load quickly, and navigation aids are useful and unobtrusive.

### **Quality of Links**

All of the links on the site are current and relevant to the specialty. Most of the links provide navigation through the AnesthesiaWeb site. Any link pointing outside the site is

clearly marked as such. One link buried in the search page pointed to an expired NewsFeed area. AnesthesiaWeb has an "Upcoming Conferences/Symposia" page, which contains a selected listing of conferences and symposia of interest to the anesthesia community. Highlighted titles are linked to either the conference organizer's web site or to "The Doctor's Guide" for more information.

### **Search Capabilities**

AnesthesiaWeb offers the ability to search their literature review archive. A search by key word, author, or date returns a colorful table of each reference. Data returned include the title, authors, print publication, commentator, issue, and abstract information. Links are provided to the article, issue, and biography of the commentator.

### **Summary**

AnesthesiaWeb is well organized, informative, and attractive. The site breaks new ground in the tasteful use of graphics, layout, and color. The monthly literature reviews are insightful and thought-provoking. The NewsFeed and Conference/Symposia areas offer valuable information to the practicing anesthesia professional and warrant frequent return visits.

### **Reviewer**

Jeffrey M. Cusick, M.D.  
Chief of Anesthesia Services  
Yokota Air Base, Japan  
PSC 78, Box 143  
APO, AP 96326  
[jeff@cusick.com](mailto:jeff@cusick.com)
